# Supplementary material for: The Role of Dietary Protein in Body Weight Regulation among Active-Duty Military Personnel during Energy Deficit: A Systematic Review
Source: MDPI journal article supplement (doi:10.3390/nu15183948), 2023-09-12
Supplement: s1 [file s1]

**Table S1.** Full Characteristics of included articles (*n* = 8).

| Reference,<br>year            | Country   | Type of Study                                | Initial<br>Sample<br>(n) | Final<br>sample (n) | Participants                                                                                  | Setting                                                               | Time<br>Period             | Study<br>length | Age<br>(yrs.) | Protein<br>Dose                          | El Measure                                                                      | EE Measure                                           | Body<br>Measure                                          | Weight |
|-------------------------------|-----------|----------------------------------------------|--------------------------|---------------------|-----------------------------------------------------------------------------------------------|-----------------------------------------------------------------------|----------------------------|-----------------|---------------|------------------------------------------|---------------------------------------------------------------------------------|------------------------------------------------------|----------------------------------------------------------|--------|
| Askew et al.,<br>1987 [21]    | U.S.A.    | Experimental<br>between groups<br>(Pre/Post) | 36                       | 34                  | 2nd and 3rd<br>Battalions,<br>Special Forces<br>soldiers during<br>field training<br>exercise | Camp Ethan<br>Allen, VT,<br>U.S.A                                     | Sept 1986 -<br>Oct 1986    | 30-days         | 27            | 112 g/day<br>vs. 64 g/day                | Self-Report &<br>nutrient analyses<br>system (USARIEM),<br>calculated from TEEE | Device<br>(ActiGraph),<br>Self-Report<br>(field log) | BW (SECA Scale),<br>FFM & FM<br>(underwater<br>weighing) |        |
| Alemaný et al.,<br>2008 [24]  | U.S.A.    | Mixed-Model,<br>Repeated-<br>Measures        | 36                       | 34                  | U.S. Marine<br>Corps infantry<br>officer<br>candidates                                        | Military field<br>exercise,<br>Quantico,<br>VA, U.S.A                 | 2006                       | 8-days          | 24.5 ±<br>0.3 | 0.9g/per<br>kg/d vs.<br>0.5g/per<br>kg/d | Observed (wrappers)<br>& MRE nutrient<br>database, DLW                          | Device<br>(ActiGraph), &<br>DLW                      | BW (digital<br>scale), FFM, FM<br>(DXA)                  |        |
| Berryman et<br>al., 2016 [23] | U.S.A.    | RCT                                          | 68                       | 63                  | U.S. Marines                                                                                  | (SERE)<br>school, Stone<br>Bay, Camp<br>Lejeune, NC,<br>U.S.A.        | Jan 2014-<br>March<br>2015 | 45-days         | 25 ± 3        | 7g/d, 84g/d,<br>or 133g/d<br>supplement  | 24-h dietary<br>recall & database<br>analysis, DLW                              | NM                                                   | BW (Digital<br>Scale), FFM, FM<br>(DEXA)                 |        |
| Booth et al.,<br>2003 [1]     | Australia | Experimental<br>btw groups                   | 39                       | 37                  | Airfield defense<br>guards                                                                    | Exercise<br>Northern<br>Awakening<br>RAAF Base<br>Amberley,<br>U.S.A. | April 1999                 | 12-days         | 22            | 63g/d, 88g/d<br>or 116g/d                | Observed (wrappers)<br>& database analysis,<br>DLW                              | Device<br>(ActiGraph)                                | BW (SECA Scale),<br>FFM & FM (BIA)                       |        |

|                              |        |                                                  |     |     |                                                               |                                                   |                         |          |        |                                        |                                                                              |                                                          |                                                                                        |
|------------------------------|--------|--------------------------------------------------|-----|-----|---------------------------------------------------------------|---------------------------------------------------|-------------------------|----------|--------|----------------------------------------|------------------------------------------------------------------------------|----------------------------------------------------------|----------------------------------------------------------------------------------------|
| Fallowfield et al., 2004 [2] | U.K.   | Within-subject, Repeated-measures                | 249 | 176 | Royal Marines stationed in U.K. for deployment to Afghanistan | 6-month deployment                                | March 2010-October 2010 | 6-months | 28 ± 7 | 125g/d vs. 95g/d                       | Self-report (diary) & DLW                                                    | (food analysis, Device (ActiGraph), Observed-Report, DLW | BW (Scale), Body Comp (skinfolds (eight sites) and circumferential girths (six sites)) |
| Margolis et al., 2014 [26]   | Norway | Longitudinal Observational                       | 21  | 21  | Norwegian conscripted soldiers                                | Minimal military experience (≤2 months)           | 2012                    | 7-days   | 20 ± 1 | 1.59g/kg/d, 1.71g/kg/d                 | Observed (wrappers & food logs) & analysis, DLW                              | DLW                                                      | BW (Digital Scale)                                                                     |
| McAdam et al., 2018 [27]     | U.S.A. | Repeated measures, double-blind, parallel groups | 69  | 69  | U.S. Army soldiers                                            | One training unit at Fort Benning Georgia, U.S.A. | 2017                    | 8-weeks  | 19 ± 1 | 0.5g vs. 38.g (2xd protein supplement) | Self-report (diet recall), ED estimation from previous work                  | NM                                                       | BW (Scale), FFM, FM (7-site skinfold)                                                  |
| Pasiakos et al., 2013 [25]   | U.S.A. | RCT                                              | 42  | 39  | Military personnel from the U.S. Army                         | Grand Forks, ND, U.S.A.                           | 2012                    | 31-days  | 21 ± 1 | 0.8g/kg/d, 1.6g/kg/d or 2.4g/kg/d      | Objective (Dietitian/metabolic kitchen prepared meals), indirect calorimetry | Device, indirect calorimetry                             | BW (digital scale), FFM, FM (DXA)                                                      |

EL, Energy Intake; EE, Energy Expenditure; BW, body weight; FM, fat mass; FFM, fat-free mass; Body Comp, Body Composition; RCT, randomized controlled trial; SERE, Survival, Evasion, Resistance, Escape; UK, United Kingdom; U.S., United States of America; BIA, bioelectrical impedance analysis; DEXA/DXA, dual x-ray absorptiometry; ED, Energy Deficit; DLW, Doubly Labeled Water, NM, Not Measured

| Table S2a. Rating of Study Quality based on Criteria from Downs and Black, 1998. |         |             |                 |                  |                |             |                |                   |                      |                        |                                  |                                 |                              |                             |                          |                   |                         |                          |                             |                      |                        |                               |                   |                              |                            |                                  |                    |
|----------------------------------------------------------------------------------|---------|-------------|-----------------|------------------|----------------|-------------|----------------|-------------------|----------------------|------------------------|----------------------------------|---------------------------------|------------------------------|-----------------------------|--------------------------|-------------------|-------------------------|--------------------------|-----------------------------|----------------------|------------------------|-------------------------------|-------------------|------------------------------|----------------------------|----------------------------------|--------------------|
| Author, Year                                                                     | 1. Aims | 2. Outcomes | 3. Participants | 4. Interventions | 5. Confounders | 6. Findings | 7. Variability | 8. Adverse Events | 9. Lost to Follow Up | 10. Probability Values | 11. Representative - Recruitment | 12. Representative - Enrollment | 13. Representative - Setting | 14. Blinding - Participants | 15. Blinding - Assessors | 16. Data Dredging | 17. Length of Follow Up | 18. Statistical Analysis | 19. Intervention Compliance | 20. Outcome Measures | 21. Recruitment - Same | 22. Recruitment - Time Period | 23. Randomization | 24. Randomization Assignment | 25. Analysis - Confounding | 26. Analysis - Loss to Follow Up | 27. Power Analysis |
| Aske<br>w et<br>al.,<br>1987<br>[21]                                             |         |             |                 |                  |                |             |                |                   |                      |                        |                                  |                                 |                              |                             |                          |                   |                         |                          |                             |                      |                        |                               |                   |                              |                            |                                  |                    |
| Alema<br>ny et<br>al.,<br>2008<br>[24]                                           |         |             |                 |                  |                |             |                |                   |                      |                        |                                  |                                 |                              |                             |                          |                   |                         |                          |                             |                      |                        |                               |                   |                              |                            |                                  |                    |
| Berry<br>man et<br>al.,<br>2016<br>[23]                                          |         |             |                 |                  |                |             |                |                   |                      |                        |                                  |                                 |                              |                             |                          |                   |                         |                          |                             |                      |                        |                               |                   |                              |                            |                                  |                    |



Overa

ll

Count

|                                |   |   |   |   |   |   |   |   |   |   |   |   |   |   |   |   |   |   |   |   |   |   |   |   |   |   |   |
|--------------------------------|---|---|---|---|---|---|---|---|---|---|---|---|---|---|---|---|---|---|---|---|---|---|---|---|---|---|---|
| Yes                            | 8 | 8 | 8 | 8 | 5 | 8 | 8 | 5 | 8 | 8 | 1 | 1 | 7 | 3 | 5 | 8 | 8 | 8 | 8 | 8 | 8 | 8 | 5 | 2 | 5 | 8 | 8 |
| Unabl<br>e to<br>Deter<br>mine | 0 | 0 | 0 | 0 | 0 | 0 | 0 | 0 | 0 | 0 | 7 | 7 | 0 | 0 | 1 | 0 | 0 | 0 | 0 | 0 | 0 | 0 | 0 | 2 | 0 | 0 | 0 |
| No                             | 0 | 0 | 0 | 0 | 3 | 0 | 0 | 3 | 0 | 0 | 0 | 0 | 1 | 5 | 2 | 0 | 0 | 0 | 0 | 0 | 0 | 0 | 3 | 4 | 3 | 0 | 0 |

| <b>Table S2b.</b> Description of Study Quality Ratings Provided by Downs and Black, 1998. |                                                                                                                                                                                                                           |
|-------------------------------------------------------------------------------------------|---------------------------------------------------------------------------------------------------------------------------------------------------------------------------------------------------------------------------|
| <b>Supplementary Table Item</b>                                                           | <b>Downs and Black Rating Prompt</b>                                                                                                                                                                                      |
| 1. Aims                                                                                   | Is the hypothesis/aim/objective of the study clearly described?                                                                                                                                                           |
| 2. Outcomes                                                                               | Are the main outcomes to be measured clearly described in the Introduction or Methods section?                                                                                                                            |
| 3. Participants                                                                           | Are the characteristics of the patients included in the study clearly described?                                                                                                                                          |
| 4. Interventions                                                                          | Are the interventions of interest clearly described?                                                                                                                                                                      |
| 5. Confounders                                                                            | Are the distributions of principal confounders in each group of subjects to be compared clearly described?                                                                                                                |
| 6. Findings                                                                               | Are the main findings of the study clearly described?                                                                                                                                                                     |
| 7. Variability                                                                            | Does the study provide estimates of the random variability in the data for the main outcomes?                                                                                                                             |
| 8. Adverse Events                                                                         | Have all important adverse events that may be a consequence of the intervention been reported?                                                                                                                            |
| 9. Lost to Follow Up                                                                      | Have the characteristics of patients lost to follow-up been described?                                                                                                                                                    |
| 10. Probability Values                                                                    | Have actual probability values been reported (e.g., 0.035 rather than $<0.05$ ) for the main outcomes except where the probability value is less than 0.001?                                                              |
| 11. Representative – Recruitment                                                          | Were the subjects asked to participate in the study representative of the entire population from which they were recruited?                                                                                               |
| 12. Representative – Enrollment                                                           | Were those subjects who were prepared to participate representative of the entire population from which they were recruited?                                                                                              |
| 13. Representative – Setting                                                              | Were the staff, places, and facilities where the patients were treated, representative of the treatment the majority of patients receive?                                                                                 |
| 14. Blinding – Participants                                                               | Was an attempt made to blind study subjects to the intervention they have received?                                                                                                                                       |
| 15. Blinding – Assessors                                                                  | Was an attempt made to blind those measuring the main outcomes of the intervention?                                                                                                                                       |
| 16. Data Dredging                                                                         | If any of the results of the study were based on “data dredging”, was this made clear?                                                                                                                                    |
| 17. Length of Follow Up                                                                   | In trials and cohort studies, do the analyses adjust for different lengths of follow-up of patients, or in case-control studies, is the time period between the intervention and outcome the same for cases and controls? |
| 18. Statistical Analysis                                                                  | Were the statistical tests used to assess the main outcomes appropriate?                                                                                                                                                  |
| 19. Intervention Compliance                                                               | Was compliance with the intervention/s reliable?                                                                                                                                                                          |
| 20. Outcome Measures                                                                      | Were the main outcome measures used accurate (valid and reliable)?                                                                                                                                                        |
| 21. Recruitment – Same Population                                                         | Were the patients in different intervention groups (trials and cohort studies) or were the cases and controls (case-control studies) recruited from the same population?                                                  |

|                                  |                                                                                                                                                                                |
|----------------------------------|--------------------------------------------------------------------------------------------------------------------------------------------------------------------------------|
| 22. Recruitment – Time Period    | Were study subjects in different intervention groups (trials and cohort studies) or were the cases and controls (case-control studies) recruited over the same period of time? |
| 23. Randomization                | Were study subjects randomized to intervention groups?                                                                                                                         |
| 24. Randomization - Assignment   | Was the randomized intervention assignment concealed from both patients and health care staff until recruitment was complete and irrevocable?                                  |
| 25. Analysis – Confounding       | Was there adequate adjustment for confounding in the analyses from which the main findings were drawn?                                                                         |
| 26. Analysis – Loss to Follow Up | Were losses of patients to follow-up taken into account?                                                                                                                       |
| 27. Power Analysis               | Was a power analysis conducted?                                                                                                                                                |
